# Supplementary material
Source: PubMed Central journal article supplement (PMC10202034)
Supplement: NIHMS1886953-supplement-Supplementary_Table_1.pdf [file NIHMS1886953-supplement-Supplementary_Table_1.pdf]

**Supplementary Table 1. Primers for RT-qPCR**

| <b>Gene</b>    | <b>Forward primer sequence (5'-3')</b> | <b>Reverse primer sequence (5'-3')</b> |
|----------------|----------------------------------------|----------------------------------------|
| <i>mt-nd1</i>  | CGGGCCCCCTTCGAC                        | GGCCGGCTGCGTATTCT                      |
| <i>mt-nd2</i>  | CACGATCAACTGAAGCAGCAA                  | ACGATGGCCAGGAGGATAATT                  |
| <i>mt-nd3</i>  | TGTAATCAGAAAAAGCAAATCCATATG            | AATAATAGAAATGTAATTGCTACCAAGAAAA        |
| <i>mt-nd5</i>  | CGGACGAACAGACGCAAATA                   | TAAAATGAATCCGATGTCTCCGA                |
| <i>mt-nd6</i>  | TTGATGGTTTGGGAGATTGGTT                 | TGCCGCTACCCCAATCC                      |
| <i>mt-cyb</i>  | TTATCGCGGCCCTAGCAA                     | TAATCCTGTTGGGTTGTTTGATCC               |
| <i>mt-co2</i>  | GAAGAGACAGTGTTTCATGTGGTGT              | TCCTGGGCCTTTCAGGAATA                   |
| <i>mt-co2</i>  | CATCCCAGGCCGACTAAATC                   | TTTCAGAGCATTGGCCATAGAA                 |
| <i>mt-co3</i>  | CAGGATTCTTCTGAGCGTTCTATCA              | AATTCCTGTTGGAGGTCAGCA                  |
| <i>mt-atp6</i> | TGTGGAAGGAAGTGGGCAA                    | CCACTATGAGCTGGAGCCGT                   |
| <i>Tnfa</i>    | CCCTCACACTCAGATCATCTTCT                | GCTACGACGTGGGCTACAG                    |
| <i>Glut1</i>   | ATGGATCCCAGCAGCAAAG                    | CCAGTGTTATAGCCGAATGC                   |
| <i>Il6</i>     | AGTTGCCTTCTTGGGACTGA                   | TCCACGATTTCCCAAGAGAAC                  |
| <i>Hk2</i>     | TGATCGCCTGCTTATTCACGG                  | AACCGCCTAGAAATCTCCAGA                  |
| <i>Ppara</i>   | AGAGCCCCATATGTCCTCTC                   | ACTGGTAGTCTGCAAAAACCAA                 |
| <i>Cpt1a</i>   | GAACTTGCCCATGTCCTTGT                   | CCAGGCTACAGTGGGACATT                   |
| <i>Cpt2</i>    | CAGACAGTGGCTACCTATGAATCCT              | TGGTCAGCTGGCCATGGTATTTGGA              |
| <i>Acadvl</i>  | TGACCTTGGTGTTAGCGTTAC                  | CTGGGCCTTTGTGCCATAGAG                  |
| <i>Acadl</i>   | TGCCCTATATTGCGAATTACGG                 | CTATGGCACCGATACACTTGC                  |
| <i>Acadm</i>   | TGACGGAGCAGCCAATGA                     | TCGTCACCCTTCTCTCTGCTT                  |
| <i>Acad11</i>  | TGGCTAACATGTACGCCATCA                  | ATCTTGGCGATCGCTGAGA                    |
| <i>Hadha</i>   | AGCAACACGAATATCACAGGAAG                | AGGCACACCCACCATTTTGG                   |
| <i>Acaa2</i>   | ATGTGCGCTTCGGAACCAAA                   | CAAGGCGTATCTGTCACAGTC                  |
| <i>Acox1</i>   | TCGAAGCCAGCGTTACGAG                    | ATCTCCGTCTGGGCGTAGG                    |
| <i>Il1b</i>    | AAGGAGAACCAAGCAACGACAAAAATA            | TTTCCATCTTCTTTTGGGTATTGC               |
| <i>Apoe</i>    | CCGTGCTGTTGGTACATTGCTGACAGGAT          | GTTCTTGTGTGACTTGGGAGCTCTGCAGCT         |
| <i>Trem2</i>   | GACCTCTCCACCAGTTTCTCC                  | TCAGAGTGATGGTGACGGTTC                  |
| <i>Fasn</i>    | GGCTCTATGGATTACCCAAGC                  | CCAGTGTTTCGTTTCTCGGA                   |
| <i>Acaca</i>   | GATGAACCATCTCCGTTGGC                   | CCCAATTATGAATCGGGAGTGC                 |
| <i>Chpt1</i>   | TGCTCATCTTCTACTGCCCTACAG               | AGAGTCCCAGGGCACATAAAAG                 |
| <i>Cept1</i>   | GCTAGGTGAGCCGCTCAGTGC                  | ATGGTGCCTCCTCCGTGACTG                  |
| <i>Hmgcs1</i>  | GACATTGCTATATATGCCACAGGAA              | CAGGGCCACAGCTCCAAT                     |
| <i>Hmgcr</i>   | GGAGCATAGGCGGCTACA                     | ACCACCCACGGTTCCTATCT                   |
| <i>Actb</i>    | GGCACCACACCTTCTACAATG                  | GTGGTGGTGAAGCTGTAGCC                   |
