# Supplementary material
Source: PubMed Central journal article supplement (PMC10202034)

# Extended Data Fig. 1b

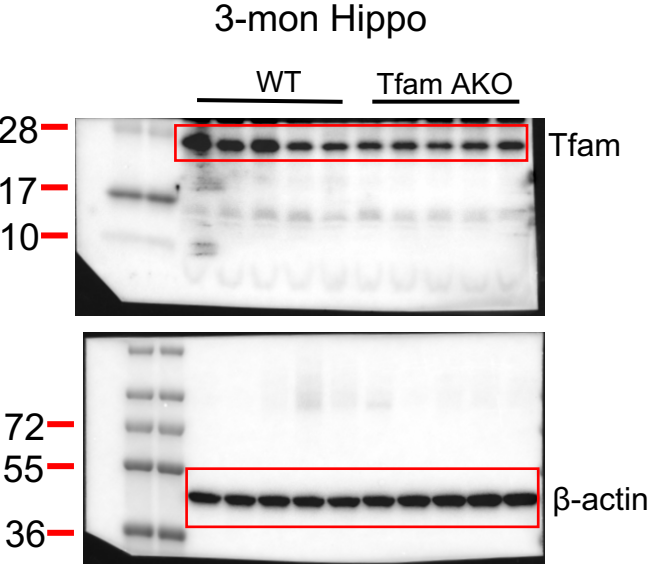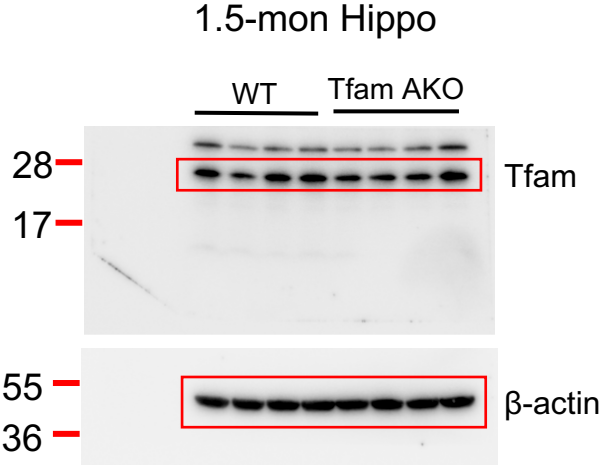

Supplement: NIHMS1886953-supplement-Unmodified_Gels_ExtendedDataFig1.pdf [file NIHMS1886953-supplement-Unmodified_Gels_ExtendedDataFig1.pdf]

Extended Data Fig. 3h

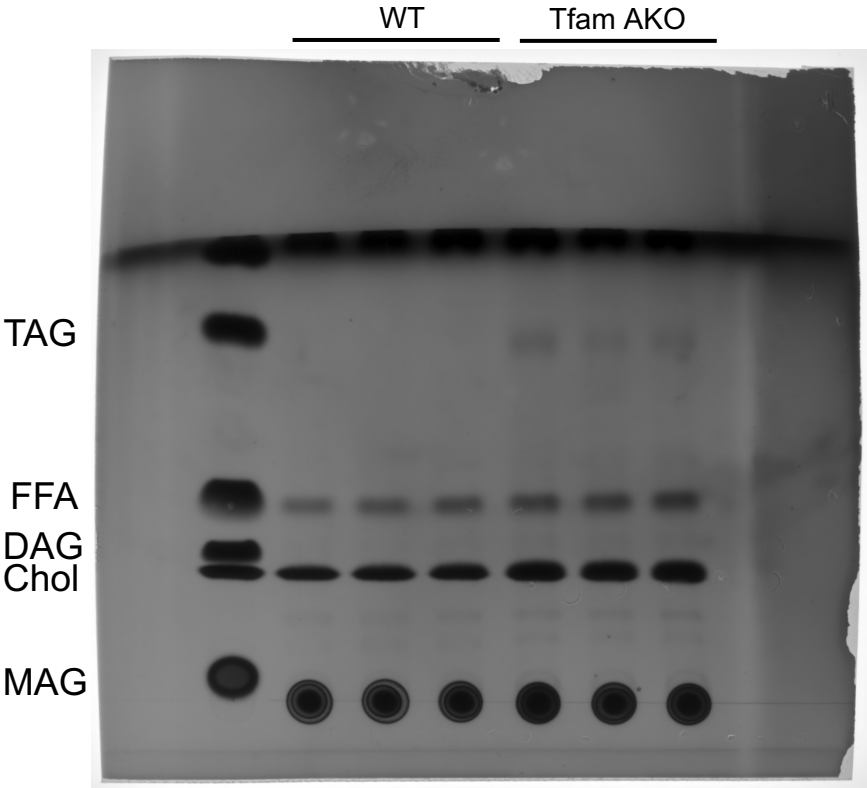

Supplement: NIHMS1886953-supplement-Unmodified_Gels_ExtendedDataFig3.pdf [file NIHMS1886953-supplement-Unmodified_Gels_ExtendedDataFig3.pdf]

Fig. 2e

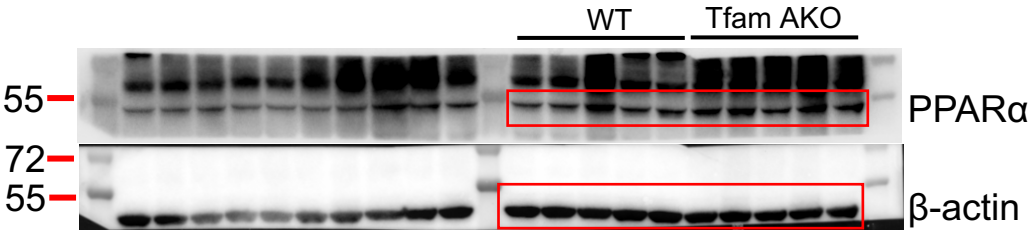

Fig. 2f

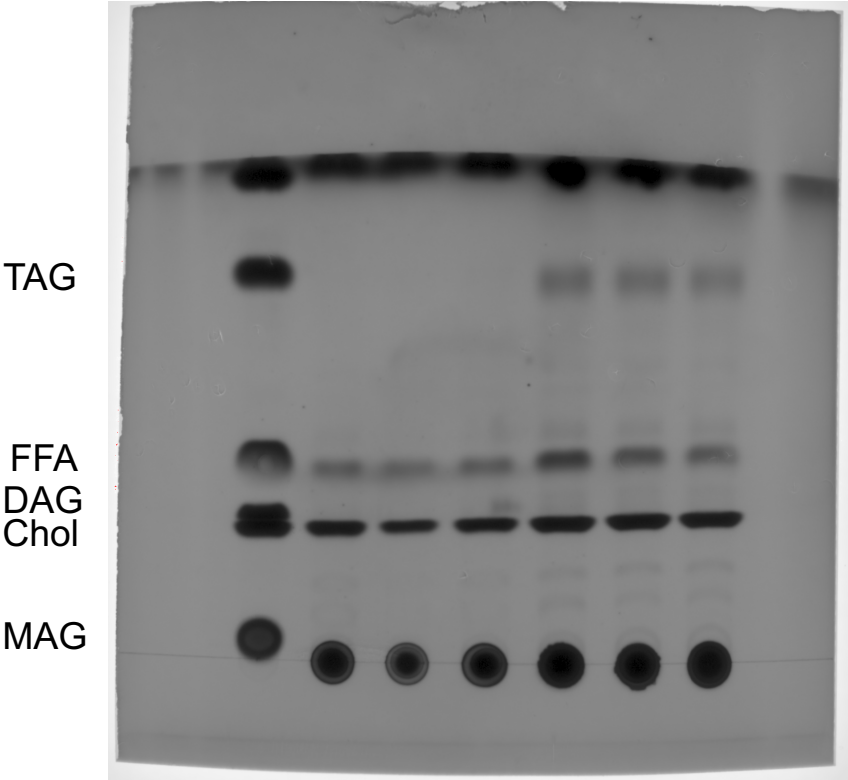

Supplement: NIHMS1886953-supplement-Unmodified_Gels_Fig2.pdf [file NIHMS1886953-supplement-Unmodified_Gels_Fig2.pdf]

Fig. 3s

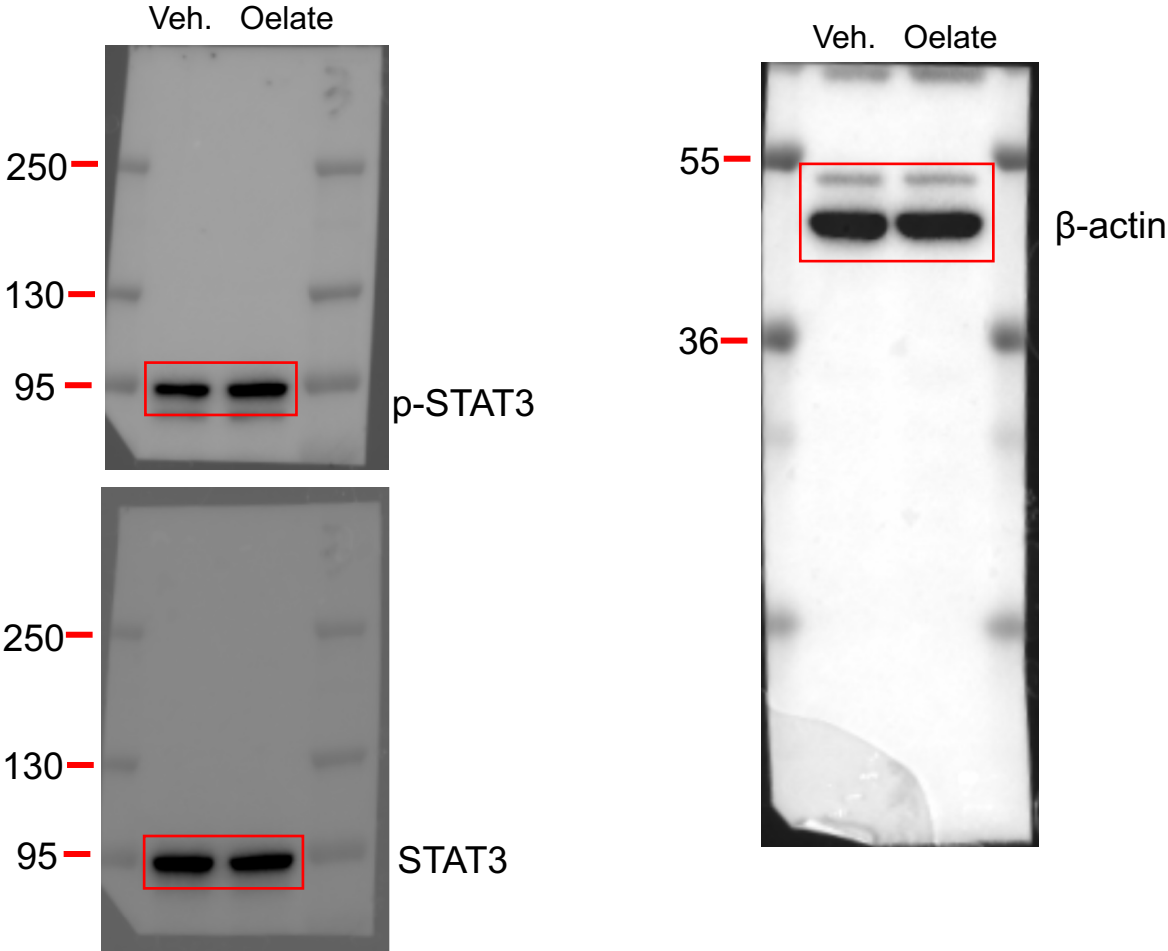

Supplement: NIHMS1886953-supplement-Unmodified_Gels_Fig3.pdf [file NIHMS1886953-supplement-Unmodified_Gels_Fig3.pdf]

Fig. 7e

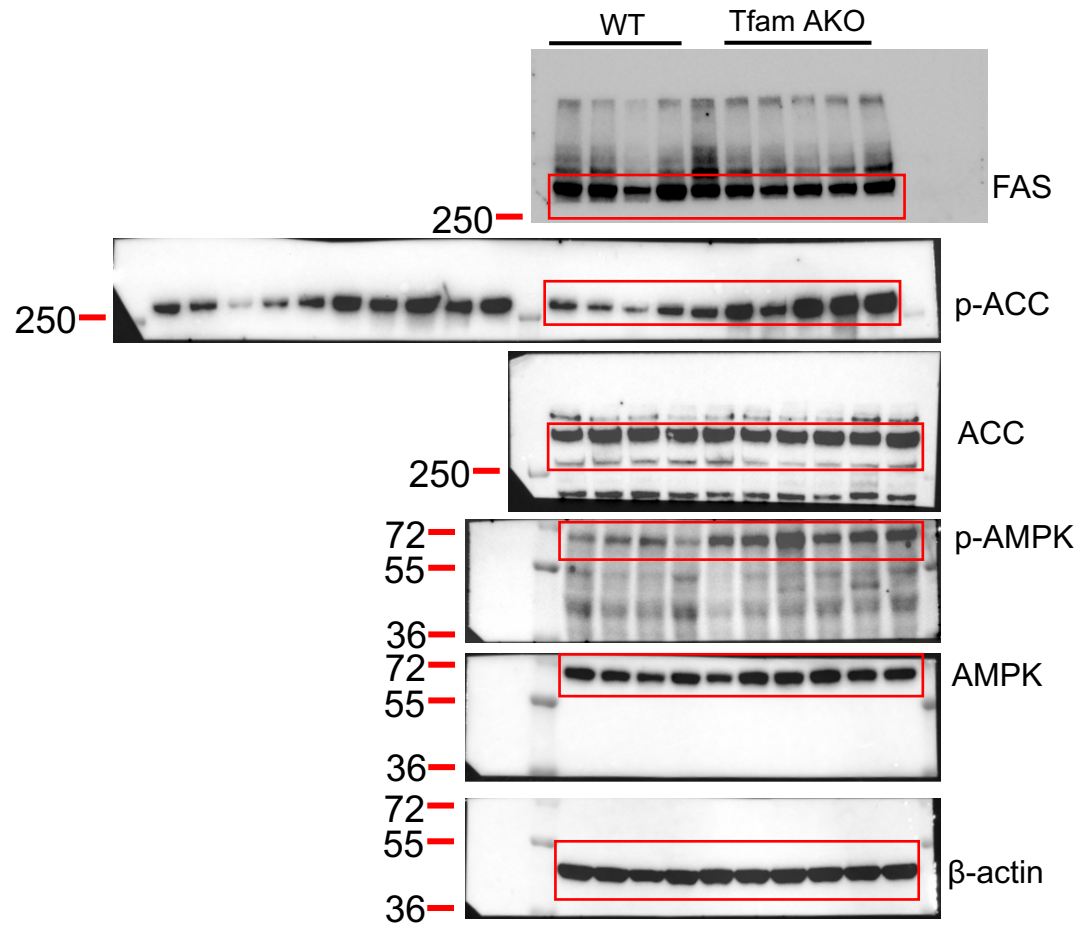

Supplement: NIHMS1886953-supplement-Unmodified_Gels_Fig7.pdf [file NIHMS1886953-supplement-Unmodified_Gels_Fig7.pdf]
